# Supplementary material for: Photocrosslinkable liver extracellular matrix hydrogels for the generation of 3D liver microenvironment models
Source: PubMed Central journal article supplement (PMC8324893; doi:10.1038/s41598-021-94990-z), 2021-07-30
Supplement: 41598_2021_94990_MOESM1_ESM.pdf [file 41598_2021_94990_MOESM1_ESM.pdf]

## Title

**Photocrosslinkable liver extracellular matrix hydrogels for the generation of 3D liver microenvironment models**

## Authors

Akhilandeswari Ravichandran<sup>1,2,3,#,\*</sup>, Berline Murekatete<sup>1,#</sup>, Denise Moedder<sup>1</sup>,  
Christoph Meinert<sup>1,4,†</sup>, Laura J Bray<sup>1,2,3,†</sup>

## Affiliations

- 1 Institute of Health and Biomedical Innovation, Queensland University of Technology (QUT), Kelvin Grove, Australia
- 2 ARC Training Centre for Cell and Tissue Engineering Technologies, Queensland University of Technology (QUT), Kelvin Grove, Australia
- 3 School of Mechanical, Medical and Process Engineering, Science and Engineering Faculty, Queensland University of Technology (QUT), Brisbane, Australia
- 4 Herston Biofabrication Institute, Metro North Hospital and Health Service, Herston, Australia

# These authors contributed equally.

† These authors share senior authorship.

Corresponding author:

Dr Akhilandeswari Ravichandran

## Supplementary Figures

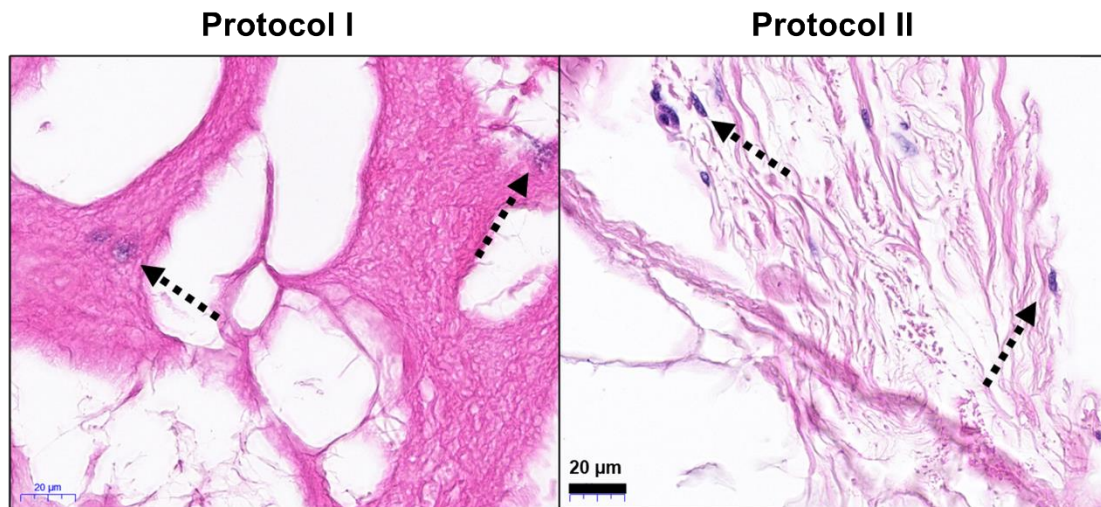

Supp Fig 1. H&E staining of decellularized tissues from Protocol I and Protocol II showing remnant nuclear content stained by hematoxylin (purple) pointed by dotted arrows.

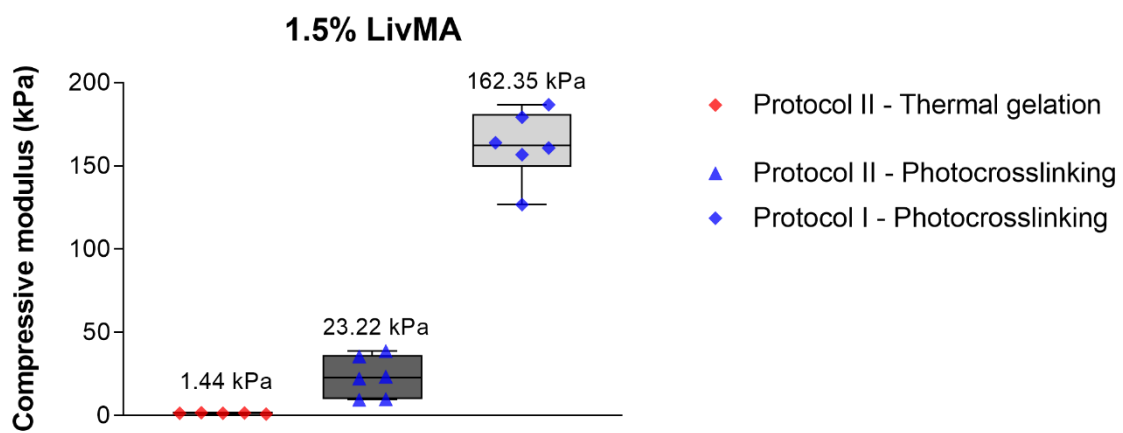

Supp Fig 2. Mechanical characterization of 1.5% LivMA hydrogels fabricated by thermal gelation (protocol II) and photocrosslinking (protocol I and II).

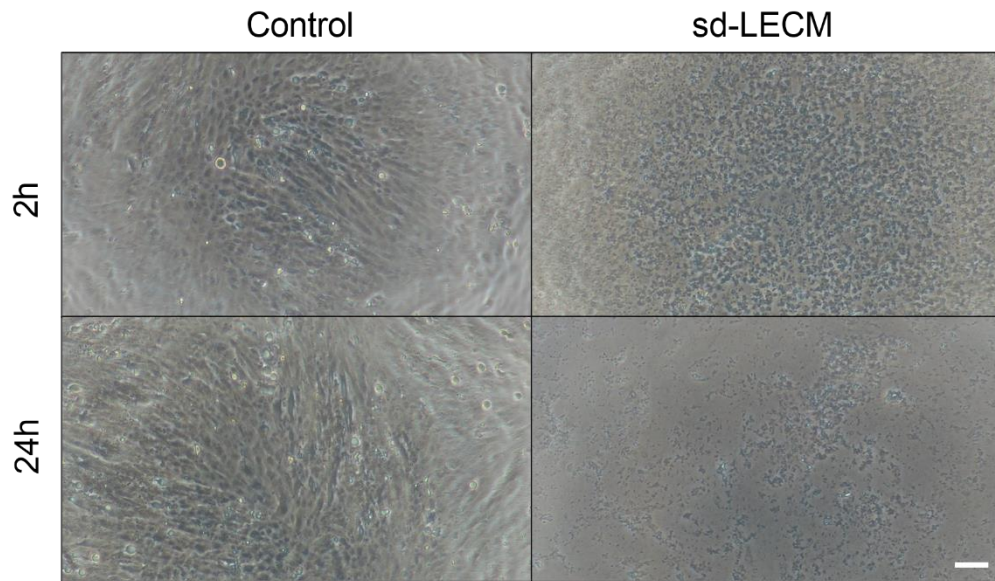

Supp Fig 3. 2D cytotoxicity assessment after 2h/24h of addition of sd-LECM solutions to IHH monolayer cultures (scale bar: 100  $\mu\text{m}$ ).
